# Supplementary material for: Invasion Pattern of Aedes aegypti in the Native Range of Ae. albopictus in Vietnam Revealed by Biogeographic and Population Genetic Analysis
Source: MDPI journal article supplement (doi:10.3390/insects13121079), 2022-11-23
Supplement: s1 [file s1]

## Supplementary

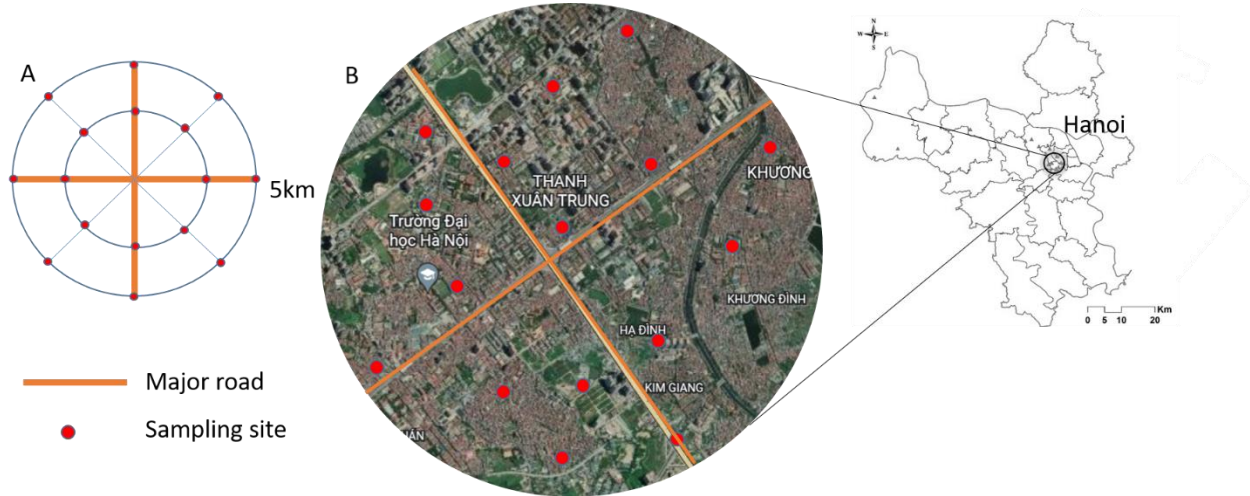

**Figure S1.** Sampling design for *Aedes* mosquitoes in a study city. A. Sampling scheme for each study site; B. An example of sampling design with selected sampling points in urban areas of a study site (S7-Hanoi city), map was retrieved from Google earth V 9.172.0.0, <http://www.earth.google.com>.

**Table S1.** Effects of species, climate, habitat, and their interactions on *Aedes aegypti* and *Ae. albopictus* abundance (Multi-Way ANOVA)

| No. | Model                  | DFn | DFd | F-statistic | P-value  |
|-----|------------------------|-----|-----|-------------|----------|
| 1   | Species                | 1   | 102 | 6.253       | 0.014    |
| 2   | Region                 | 1   | 102 | 1.615       | 0.27     |
| 3   | Habitat                | 2   | 102 | 98.786      | <0.00001 |
| 4   | Species:Region         | 1   | 102 | 81.021      | <0.00001 |
| 5   | Species:Habitat        | 2   | 102 | 17.434      | <0.00001 |
| 6   | Region:Habitat         | 2   | 102 | 1.047       | 0.355    |
| 7   | Species:Region:Habitat | 2   | 102 | 41.994      | <0.00001 |

**Table S2.** Partitioning of genetic variation among *Aedes aegypti* populations in Vietnam

| Hypotheses                                 | Source of variation | Percentage of variation | F-statistic | P value |
|--------------------------------------------|---------------------|-------------------------|-------------|---------|
| 1. Two groups: North and Centre + South    | $\Phi_{CT}$         | 4.42                    | 0.0442      | 0.02    |
| - North (S07, S08, S09)                    | $\Phi_{SC}$         | -2.30                   | -0.0241     | 0.78    |
| - Centre + South (S12, S14, S15, S17, S18) | $\Phi_{ST}$         | 97.88                   | 0.0211      | 0.43    |
| 2. Three groups: North, Central and South  | $\Phi_{CT}$         | 2.33                    | 0.0234      | 0.113   |
| - North (S07, S08, S09)                    | $\Phi_{SC}$         | -1.70                   | -0.0174     | 0.652   |
| - Central (S12, S14, S15)                  | $\Phi_{ST}$         | 99.36                   | 0.0064      | 0.433   |
| - South (S17, S18)                         |                     |                         |             |         |

**Table S3.** Geographic origin and *COI* sequences of *Aedes aegypti* used in phylogeographic analysis. COI sequences were retrieved from GenBank (<https://www.ncbi.nlm.nih.gov/nucleotide/>; Accessed on 23 September 2021)

| Geographical area | Country               | Accession Number |
|-------------------|-----------------------|------------------|
| Central Africa    | Cameroon              | JQ926702         |
| West Africa       | Bennin                | KX446400         |
|                   | Bennin                | KX446402         |
|                   | Guinea                | HQ688292         |
|                   | Guinea                | HQ688293         |
| East Africa       | Kenya                 | KX420438         |
|                   | Kenya                 | KX420460         |
|                   | Kenya                 | MK533627         |
|                   | Uganda                | KX446420         |
|                   | Uganda                | KX446438         |
| North America     | Mexico                | MT108569         |
|                   | Mexico                | MT108574         |
|                   | Mexico                | MT108661         |
|                   | USA                   | GU907840         |
|                   | USA                   | GU907841         |
|                   | USA                   | JQ926684         |
| Caribbean         | Martinique            | JQ926696         |
|                   | Venezuela             | JQ926701         |
| Central America   | Panama                | KX171389         |
|                   | Panama                | KX171390         |
|                   | Panama                | KX171394         |
| South America     | Brazil                | JQ926703         |
|                   | Chile                 | HQ991718         |
|                   | France: Guyana        | HQ688297         |
|                   | Peru                  | MN299016         |
|                   | Argentina             | MN299024         |
|                   |                       |                  |
| Indian Ocean      | France: Europa Island | HQ688296         |
| Southwest Asia    | India                 | MK542379         |
|                   | India                 | MK635053         |
|                   | Pakistan              | KF406349         |
| Southeast Asia    | Thailand              | HQ688295         |
|                   | Thailand              | JQ926691         |
|                   | Thailand              | JQ926692         |
|                   | Thailand              | KM613046         |
|                   | Thailand              | KM613048         |
|                   | Thailand              | KM613055         |
|                   | Cambodia              | HQ688294         |
|                   | Cambodia              | JQ926688         |
|                   | Cambodia              | JQ926689         |
|                   | Cambodia              | JQ926690         |
|                   | Malaysia              | MF148257         |
|                   | Malaysia              | MF148262         |
|                   | Vietnam               | JQ926686, 87     |

**Table S4.** Worldwide survey of haplotype similarities of Vietnamese *Aedes aegypti* haplotypes. COI sequences were retrieved from GenBank (<https://www.ncbi.nlm.nih.gov/nucleotide/>; Accessed on 23 September 2021).

| Haplotype | GenBank code                                                                                             | Region         | Country                             |
|-----------|----------------------------------------------------------------------------------------------------------|----------------|-------------------------------------|
| H1        | MN299016                                                                                                 | South America  | Peru                                |
|           | MN299008                                                                                                 | South America  | Puerto Rico                         |
|           | MK542380                                                                                                 | South Asia     | India                               |
|           | KC970271                                                                                                 | South Asia     | India                               |
|           | MF443395-97                                                                                              | North America  | Canada                              |
|           | MF148262,<br>MF148257                                                                                    | Southeast Asia | Malaysia: Selangor                  |
|           | MF043259                                                                                                 | Europe         | United Kingdom: England             |
|           | KY022526                                                                                                 | Europe         | Germany                             |
|           | MW961318, 19                                                                                             | Europe         | Portugal                            |
|           | MZ230361                                                                                                 | Southeast Asia | Vietnam                             |
|           | MK505603,<br>MK505600, 01<br>MK505698,<br>MK505695,<br>MK505685,86<br>MK505679,<br>MK505677,<br>MK505672 | Europe         | United Kingdom: England             |
|           | MW509605                                                                                                 | South America  | Puerto Rico                         |
|           | MT108574                                                                                                 | North America  | Mexico                              |
|           | MN733743,<br>MN733745-53                                                                                 | Pacific Ocean  | New Caledonia                       |
|           | HQ991718                                                                                                 | South America  | Chile                               |
|           | AF425846                                                                                                 | North America  | Canada, Lab conlony                 |
| H2        | MZ230363                                                                                                 | Southeast Asia | Vietnam                             |
|           | GU675484                                                                                                 | Pacific Ocean  | Australia                           |
| H3        | MK890402                                                                                                 | South America  | Ecuador                             |
|           | KX420476                                                                                                 | South America  | Ecuador                             |
|           | MZ230362                                                                                                 | Southeast Asia | Vietnam                             |
|           | MT108569                                                                                                 | North America  | Mexico                              |
|           | AY432106,<br>AY432648                                                                                    | Europe         | United Kingdom:<br>Liverpool-strain |
| H7        | KF406376                                                                                                 | Southwest Asia | Pakistan                            |
|           | HM399357                                                                                                 | Pacific Ocean  | Australia                           |
|           | MZ230364                                                                                                 | Southeast Asia | Vietnam                             |

**Table S5.** Correlation between genetic diversity and abundance of *Ae. aegypti* and *Ae. albopictus* across Vietnam.

| Co-occurrence | Region                                                     | <i>Ae. aegypti</i> |                        | <i>Ae. albopictus</i> |                        |
|---------------|------------------------------------------------------------|--------------------|------------------------|-----------------------|------------------------|
|               |                                                            | Hd, $\pi$          | No. of individual/site | Hd, $\pi^*$           | No. of individual/site |
| No            | Northeast (S4, S5, S6)                                     | NC                 | NC                     | 0.760, 0.0022         | 432±43.6               |
|               | Northwest (S1, S2, S3)                                     |                    |                        | 0.9016, 0.0034        | 1112±238.2             |
| Yes           | North Delta and North Central coast (S7, S8, S9, S10, S11) | 0.8413, 0.0100     | 202.8±156.5            | 0.8763, 0.0032        | 878±91.8               |
|               | Southern (S12, S13, S14, S15, S16, S17, S18)               | 0.8882, 0.0091     | 868±276.5              | 0.8308, 0.0025        | 401±143.1              |

Hd: Haplotype diversity,  $\pi$ : nucleotide diversity, NC: not computed, \*genetic diversity indices data of *Aedes albopictus* were retrieved from Duong et al. 2021<sup>52</sup>.
